# Supplementary material for: Vitamin A inhibits the action of LPS on the intestinal epithelial barrier function and tight junction proteins
Source: Royal Society of Chemistry journal article supplement (doi:10.1039/c8fo01123k), 2019-01-01
Supplement: c8fo01123k1.pdf [file c8fo01123k1.pdf]

Supplemental Figure

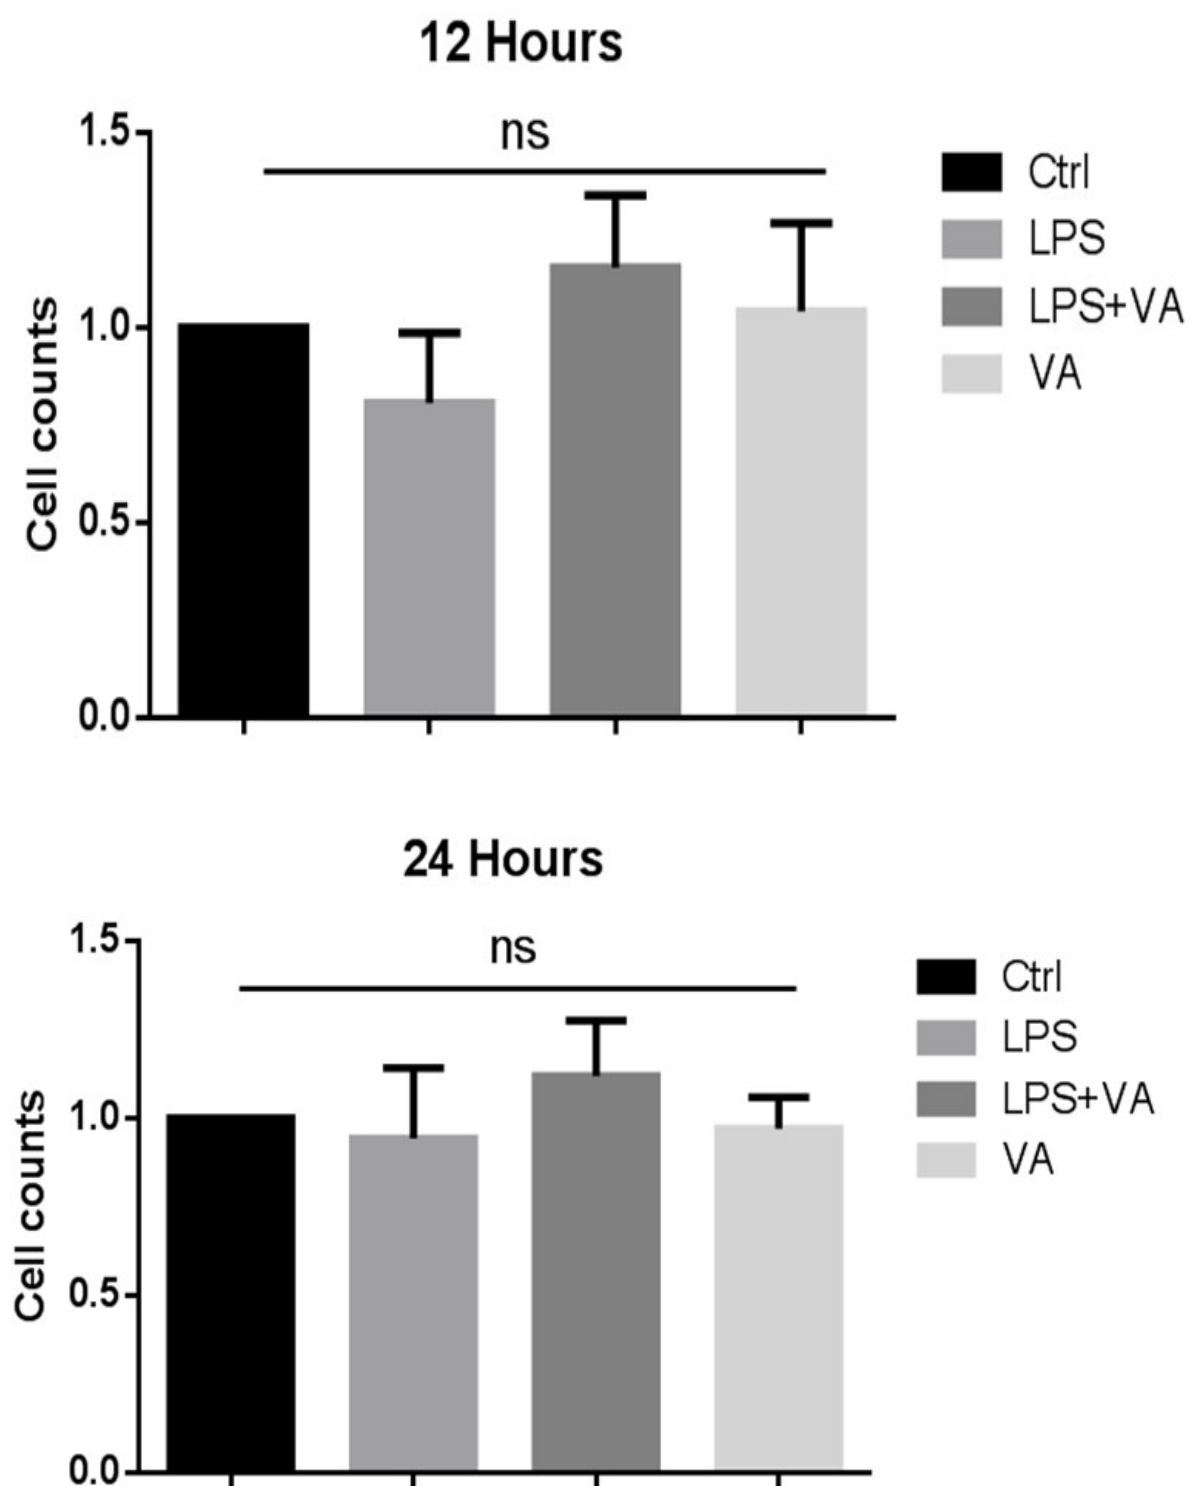

IPEC-J2 cells were treated with a vehicle control,

inflammatory stimulus of 1  $\mu\text{g/mL}$  LPS, inflammatory stimulus combined with 0.1  $\mu\text{mol/L}$  Vitamin A (1  $\mu\text{g/mL}$  LPS + 0.1  $\mu\text{mol/L}$  VA) and 0.1  $\mu\text{mol/L}$  Vitamin A from 0 to 24h. Microscopic images of the cell counts were taken on a Zeiss LSM 510 Meta Confocal Laser Scanning Microscope at 12 and 24 hours respectively. Cell counts were analysed by image J in a fixed area. Bar graphs represented the statistical results by normalizing into controls (n=5). The results demonstrated that different treatment conditions did not cause any significant alterations of cell counts, indicating that cell density in each treatment keeps unchanged.
